# Supplementary material
Source: PubMed Central journal article supplement (PMC384782)

### A. Creation of DHS-enriched sample (DHSE)

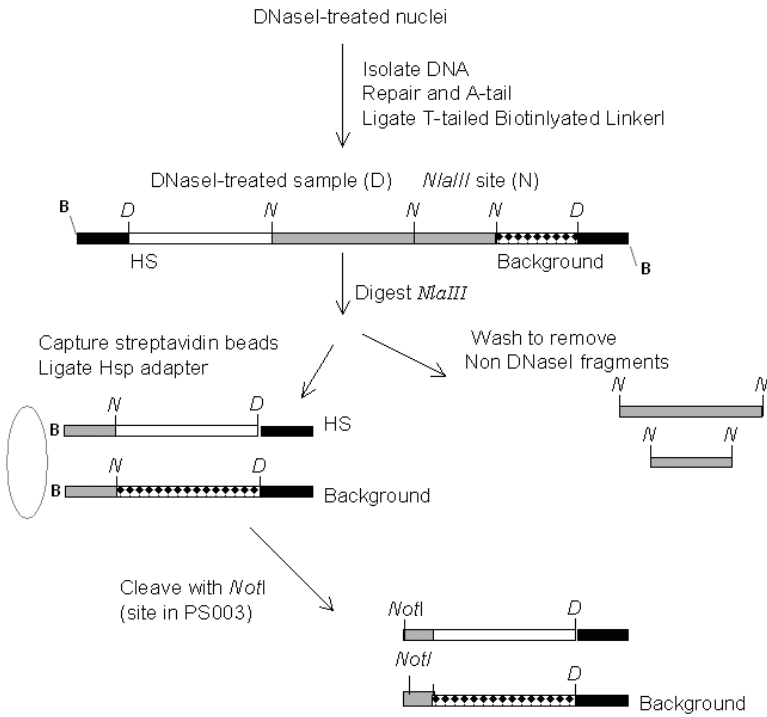

### B. Creation of DHS-depleted sample (DHSD)

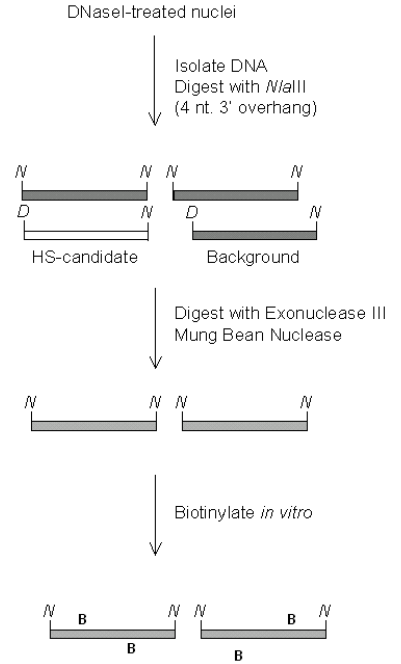

### C. Subtractive enrichment to create ACS libraries

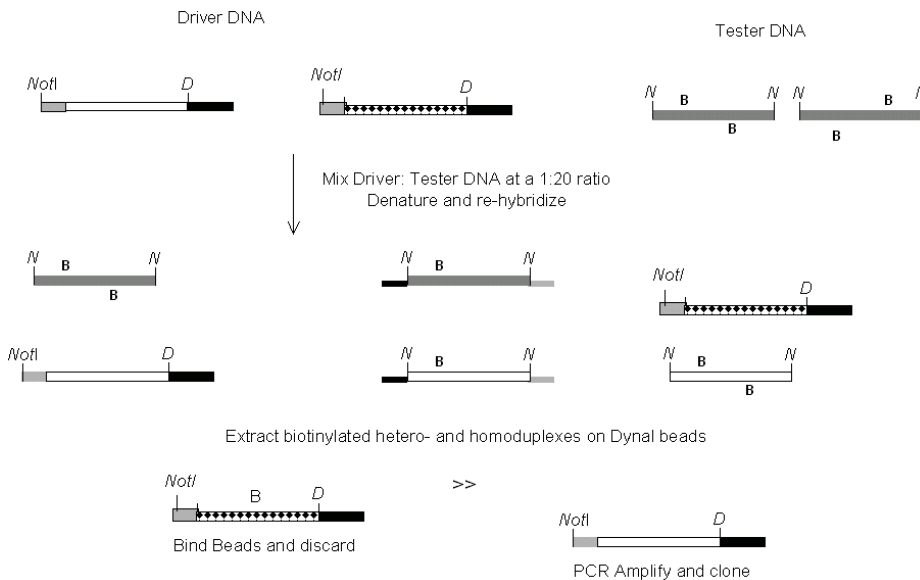

Supplement: pnas_101_13_4537__3.pdf [file pnas_101_13_4537__3.pdf]
