# Supplementary material
Source: PubMed Central journal article supplement (PMC384782)

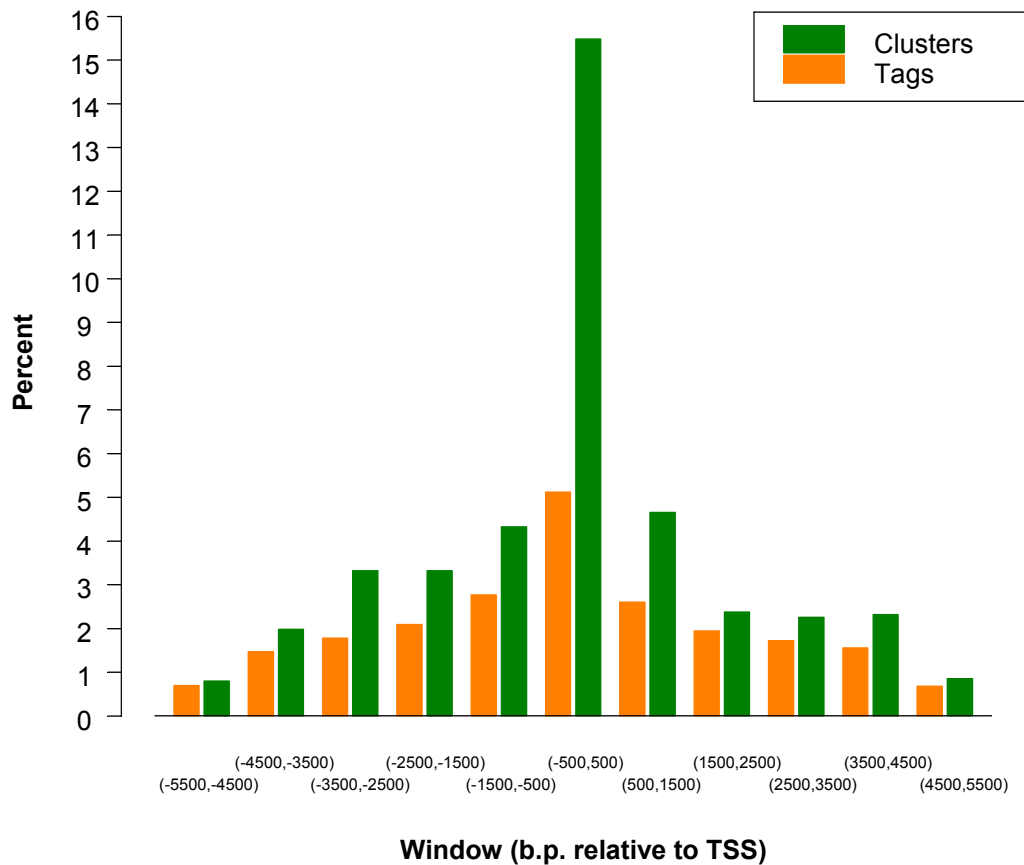

Supplement: pnas_101_13_4537__5.pdf [file pnas_101_13_4537__5.pdf]
